# Supplementary material for: The protective effect of social support on all-cause and cardio-cerebrovascular mortality among middle-aged and older adults in the US
Source: PubMed Central journal article supplement (PMC10899207; doi:10.1038/s41598-024-55012-w), 2024-02-27
Supplement: 41598_2024_55012_MOESM1_ESM.pdf [file 41598_2024_55012_MOESM1_ESM.pdf]

**Supplementary Figure 1** Probability-probability plot of body mass index.

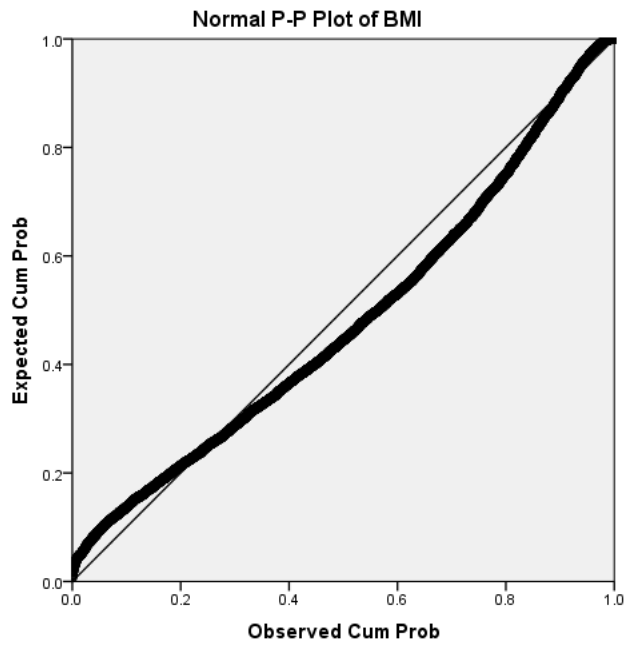

**Supplementary Figure 2** Probability-probability plot of American Heart Association secondary diet score.

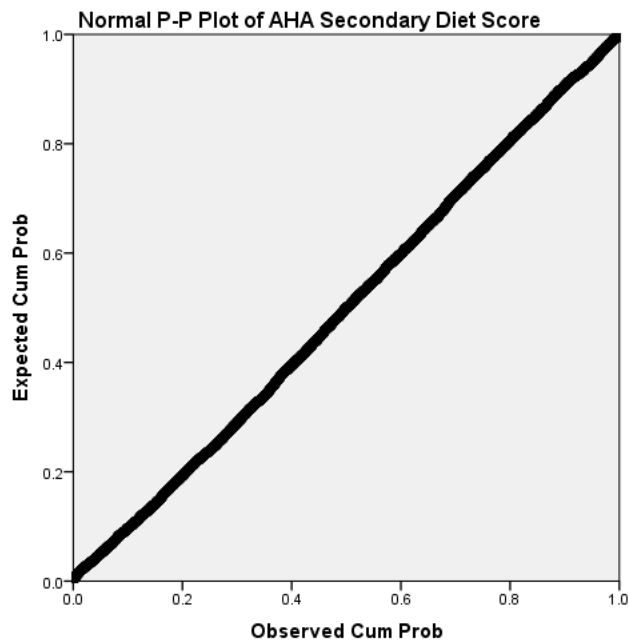

Supplementary Table 1. Descriptive statistics of individual social support variables.

| Individual social support variable                    | Total  | Number (%) |
|-------------------------------------------------------|--------|------------|
| Emotional support                                     |        | 6183(91.2) |
| Financial support                                     |        | 4964(73.3) |
| Attending religious services frequency $\geq$ 4 times | n=6776 | 3972(58.6) |
| Number of close friends $\geq$ 4                      |        | 4262(62.9) |
| Married or living as married                          |        | 4179(61.7) |

Supplementary Table 2. Cox univariate proportional hazard ratios (HRs) for all-cause and cardio-cerebrovascular mortality by social support score in different models.

| Variable                                                  | All-cause Mortality |      |           | Cardio-cerebrovascular Mortality |      |           |
|-----------------------------------------------------------|---------------------|------|-----------|----------------------------------|------|-----------|
|                                                           | P                   | HR   | 95%CI     | P                                | HR   | 95%CI     |
| Social support level (As categorical variable)            | <b>&lt;0.001</b>    | 0.72 | 0.67-0.79 | <b>&lt;0.001</b>                 | 0.65 | 0.54-0.78 |
| Age (As categorical variable)                             | <b>&lt;0.001</b>    | 2.21 | 2.11-2.32 | <b>&lt;0.001</b>                 | 2.29 | 2.06-2.54 |
| Male (As categorical variable)                            | <b>&lt;0.001</b>    | 0.78 | 0.69-0.86 | <b>0.001</b>                     | 0.67 | 0.53-0.86 |
| BMI (As numerical continuous variable)                    | <b>&lt;0.001</b>    | 0.97 | 0.96-0.98 | <b>0.004</b>                     | 0.97 | 0.95-0.99 |
| Education level (As categorical variable)                 | <b>&lt;0.001</b>    | 0.77 | 0.73-0.81 | <b>&lt;0.001</b>                 | 0.76 | 0.68-0.86 |
| Race (As categorical variable)                            | <b>0.003</b>        | 1.11 | 1.04-1.19 | 0.21                             | 1.1  | 0.95-1.29 |
| Cardiovascular disease history (As categorical variable)  | <b>&lt;0.001</b>    | 3.35 | 2.97-3.78 | <b>&lt;0.001</b>                 | 5.47 | 4.26-7.03 |
| Cerebrovascular disease history (As categorical variable) | <b>&lt;0.001</b>    | 3.45 | 2.97-4.00 | <b>&lt;0.001</b>                 | 4.52 | 3.32-6.15 |

CI = confidence interval.

HR = hazard ratios.

BMI = Body mass index.

Bold characters mean a statistical significance.
